# Supplementary material for: Evaluating the Effect of Cell Culture on Gene Expression in Primary Tissue Samples Using Microfluidic-Based Single Cell Transcriptional Analysis
Source: Microarrays (Basel). 2015 Nov 4;4(4):540–50. doi: 10.3390/microarrays4040540 (PMC4996408; doi:10.3390/microarrays4040540)
Supplement: Supplementary file 1 [file microarrays-04-00540-s001.pdf]

## Supplementary Information

**Table S1.** TaqMan assays used to interrogate gene expression within human adipose-derived stem cells. All assays were obtained from Applied Biosystems (Foster City, CA, USA).

| Gene ID | Assay ID       | Gene ID   | Assay ID       |
|---------|----------------|-----------|----------------|
| ADAM 10 | Hs00153853 m1  | IL10RB    | Hs00175123 m1  |
| ATP1B3  | Hs00740857 mH  | IL13RA1   | Hs00609817 m1  |
| BSG     | Hs00936295 m1  | IL5RA     | Hs00602482 m1  |
| BST2    | Hs00171632 m1  | IL6ST     | Hs00174360 m1  |
| CD151   | Hs00388381 m1  | ITGA5     | Hs01547673 m1  |
| CD276   | Hs00987207 m1  | JAM2      | Hs01022013 m1  |
| CD302   | Hs00994886 m1  | KLRD1     | Hs00233844 m1  |
| CD47    | Hs00179953 m1  | LEPR      | Hs00174497 m1  |
| CD70    | Hs00174297 m1  | LIN28     | Hs00702808 s1* |
| CD79A   | Hs00233566 m1  | MRC1      | Hs00267207 m1  |
| CD83    | Hs00188486 m1  | MRC2      | Hs00195862 m1  |
| CD99    | Hs00365982 m1  | NANOG     | Hs02387400 g1* |
| CDH5    | Hs00901463 m1  | NRP1      | Hs00826128 m1  |
| DDR2    | Hs00178815 m1  | POU5F1    | Hs00999634 gH* |
| DPPA3   | Hs01657068 g1* | PRNP      | Hs00175591 m1  |
| ENPEP   | Hs00157366 m1  | PTGFRN    | Hs01385989 m1  |
| FCGR2A  | Hs00234969 m1  | TLR3      | Hs01551078 m1  |
| FCGR2C  | Hs00234969 m1  | TLR4      | Hs00152939 m1  |
| FGFR1   | Hs00915142 m1  | TNFRSF10D | Hs00388742 m1  |
| FZD4    | Hs00201853 m1  | TNFRSF12A | Hs00171993 m1  |
| GYPC    | Hs00242584 m1  | TNFRSF1A  | Hs01042313 m1  |
| IFITM1  | Hs01652522 g1  | TNFRSF1B  | Hs00961749 m1  |
| IGF2R   | Hs00974474 m1  | TNFSF10   | Hs00921974 m1  |
| IL10RA  | Hs00155485 m1  | TSPAN7    | Hs00190284 m1  |

\* Assay did not produce exponential amplification, excluded from analysis.

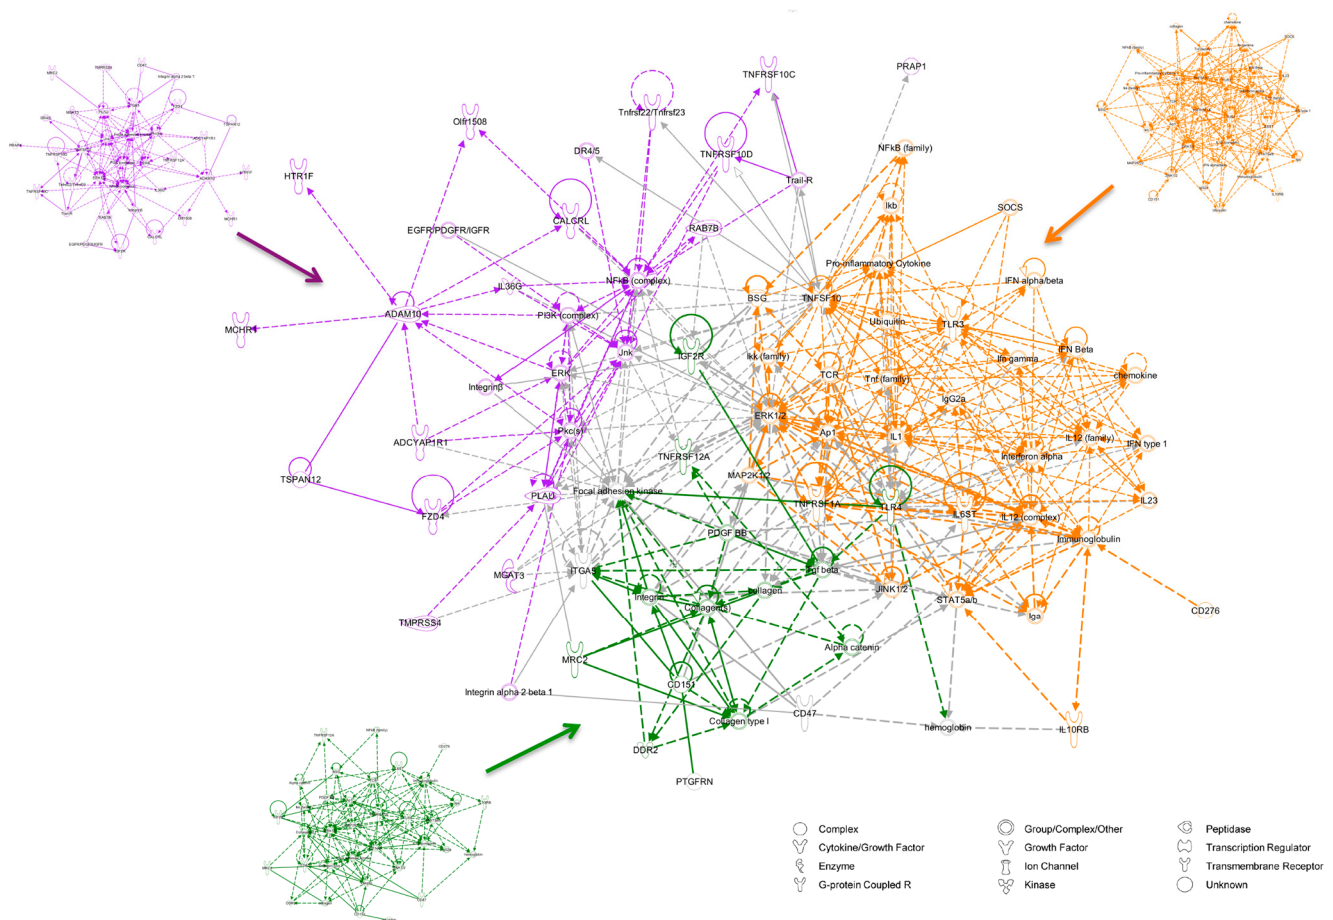

**Figure S1.** Merged network analysis of fresh, passage 0, and passage 1 adipose-derived stem cells. The top scoring Ingenuity Pathway Analysis (IPA)-constructed transcriptome networks generated from genes that were significantly up-regulated in cluster 1 (purple), cluster 2 (orange), or cluster 3 (green), as enumerated in Figure 5, were merged using IPA's Ingenuity Knowledge Base. Direct relationships are indicated by solid lines, and dashed lines represent indirect relationships.
